# Supplementary material for: Anthropogenic drivers of 2013–2017 trends in summer surface ozone in China
Source: PubMed Central journal article supplement — Proc Natl Acad Sci U S A. 2018 Dec 31;116(2):422–7. doi: 10.1073/pnas.1812168116 (PMC6329973; doi:10.1073/pnas.1812168116), 2018-12-31
Supplement: pnas.1812168116.sapp.pdf [file pnas.1812168116.sapp.pdf]

## Supplementary Information for

### Anthropogenic drivers of 2013–2017 trends in summer surface ozone in China

Ke Li<sup>a,b</sup>, Daniel J. Jacob<sup>b,1</sup>, Hong Liao<sup>a,c,1</sup>, Lu Shen<sup>b</sup>, Qiang Zhang<sup>d</sup>, and Kelvin H. Bates<sup>b</sup>

<sup>a</sup>Harvard-NUIST Joint Laboratory for Air Quality and Climate, Nanjing University of Information Science and Technology, Nanjing 210044, China

<sup>b</sup>John A. Paulson School of Engineering and Applied Sciences, Harvard University, Cambridge, MA 02138, United States

<sup>c</sup>Jiangsu Key Laboratory of Atmospheric Environment Monitoring and Pollution Control, Collaborative Innovation Center of Atmospheric Environment and Equipment Technology, School of Environmental Science and Engineering, Nanjing University of Information Science & Technology, Nanjing 210044, China

<sup>d</sup>Department of Earth System Science, Tsinghua University, Beijing 100084, China

<sup>1</sup>*Correspondence to:*

Email: Daniel J. Jacob ([djacob@fas.harvard.edu](mailto:djacob@fas.harvard.edu)) or Hong Liao ([hongliao@nuist.edu.cn](mailto:hongliao@nuist.edu.cn))

**This PDF file includes:**

Supplementary text  
Figs. S1 to S9  
Tables S1 to S4  
Reference

## Supplementary Information Text

### 1 GEOS-Chem simulations

#### 1.1 Detailed GEOS-Chem description

The simulations of tropospheric ozone were carried out with the nested-grid version of the GEOS-Chem model with a horizontal resolution of  $0.5^\circ \times 0.625^\circ$  (version 11-02, <http://geos-chem.org>) (1), driven by the assimilated meteorological data of MERRA-2. The nested domain is set over Asia ( $60^\circ\text{--}150^\circ\text{E}$ ,  $10^\circ\text{S--}55^\circ\text{N}$ ), and chemical boundary conditions are updated every 3 h from a global simulation with  $4^\circ \times 5^\circ$  resolution. The GEOS-Chem model includes fully coupled ozone- $\text{NO}_x$ -VOC-halogen-aerosol chemistry (2) with up-to-date chemical rate constants from JPL Publication 15-10. The impact of aerosols on gas-phase chemistry in GEOS-Chem is through the effect of aerosol extinction on photolysis rates (3) and through heterogeneous processes (4). Heterogeneous processes include  $\text{N}_2\text{O}_5$  uptake by aerosols from Evans and Jacob (5), the absorption of  $\text{NO}_3$  and  $\text{NO}_2$  on wet aerosols (4), and  $\text{HO}_2$  uptake with a reactive uptake coefficient of 0.2 for conversion to  $\text{H}_2\text{O}$  (4, 6).

Emissions in GEOS-Chem model are computed by the Harvard-NASA Emission Component (HEMCO), as introduced by Keller et al. (7). Global default anthropogenic emissions are from the CEDS (Community Emissions Data System, 8). They are overwritten by MEIC (Multi-resolution Emission Inventory for China) in China and by MIX in other regions of Asia (9). Open fire emissions are from the Global Fire Emissions Database (GFED4) (10). Natural emissions of ozone precursors, including  $\text{NO}_x$  from lightning and soil and VOCs from vegetation, are calculated on the basis of the assimilated MERRA-2 meteorology. The biogenic emissions of VOC are calculated according to the Model of Emissions of Gases and Aerosols from Nature (MEGAN-2; 11).

#### 1.2 Evaluation of GEOS-Chem simulation

The capability of the GEOS-Chem model to simulate surface ozone over China has been evaluated using ground-level measurements (12–14), aircraft (15,16), ozonesonde data (16), and satellites (17). Here we evaluate the GEOS-Chem simulation with the China Ministry of Ecology and Environment (MEE) surface measurement network used in this work. Fig. S2 shows the comparison for 2017. MDA8 ozone over China has an average value of  $58.5 \pm 15.4$  ppb in the observations and  $63.0 \pm 14.8$  ppbv in the model. The spatial pattern of summertime ozone is well captured, with a correlation coefficient of 0.89. For  $\text{PM}_{2.5}$ , observed and simulated values have an average of  $27.2 \pm 10.8$ , and  $28.7 \pm 16.8$   $\mu\text{g m}^{-3}$ , respectively, with a correlation coefficient of 0.70.

### 1.3 Sensitivity simulations

To identify the driving factors of the ozone trend, we performed a set of sensitivity simulations using the GEOS-Chem model (**Table S4**). We conducted a control run simulation with 2013 MEIC emissions and 2013 MERRA-2 meteorology (CTRL) and a set of sensitivity runs:

- (1) The same as the CTRL simulation except Chinese anthropogenic NO<sub>x</sub> and VOC emissions are set to 2017. (Run\_NO<sub>x</sub>\_VOC);
- (2) The same as the CTRL simulation except Chinese anthropogenic NO<sub>x</sub> emissions are set to 2017 (Run\_NO<sub>x</sub>);
- (3) The same as the CTRL simulation except simulated aerosol extinction (AOD) is scaled to 2017 using satellite-based AOD changes in the calculation of photolysis rates and simulated aerosol surface area is scaled to 2017 using measurement-based PM<sub>2.5</sub> changes in the calculation of heterogeneous reactions (Run\_Hete\_All);
- (4) The same as the Run\_Hete\_All simulation except measurement-based PM<sub>2.5</sub> changes are not applied in the calculation of aerosol chemistry reactions for N<sub>2</sub>O<sub>5</sub> (Run\_Hete\_N<sub>2</sub>O<sub>5</sub>);
- (5) The same as the Run\_Hete\_All simulation except measurement-based PM<sub>2.5</sub> changes are not applied in the calculation of aerosol chemistry reactions for NO<sub>2</sub>/NO<sub>3</sub> (Run\_Hete\_NO<sub>x</sub>);
- (6) The same as the Run\_Hete\_All simulation except measurement-based PM<sub>2.5</sub> changes are not applied in the calculation of aerosol chemistry reactions for HO<sub>2</sub> (Run\_Hete\_HO<sub>2</sub>);
- (7) The same as the CTRL simulation except simulated aerosol extinction (AOD) is scaled to 2017 using satellite-based AOD changes in the calculation of photolysis rates and (Run\_AOD).
- (8) The same as the Run\_Hete\_HO<sub>2</sub> simulation except product of HO<sub>2</sub> uptake by aerosol changed from H<sub>2</sub>O to H<sub>2</sub>O<sub>2</sub>. (Run\_Hete\_HO<sub>2</sub>\_H<sub>2</sub>O<sub>2</sub>).

The effect of aerosol chemistry in the sensitivity simulation is estimated using changes in measured PM<sub>2.5</sub> concentrations from 2013 to 2017 that are applied as scaling factors to simulated aerosol surface area in the boundary layer below 1.3 km. The effect of changing AOD on photolysis rates is estimated using observed changes in AOD from 2013 to 2017 applied as scaling factors to simulated AOD in the calculation of photolysis rate through the tropospheric column. All simulations were performed for the period of 1 June to 31 August of meteorological year 2013 after a one-month model spin up.

### 2 Attribution of anthropogenic drivers in ozone trend

The roles of changing emissions of ozone precursors (NO<sub>x</sub> and VOC) are quantified by simulations of Run\_NO<sub>x</sub>\_VOC and Run\_NO<sub>x</sub>. The role of aerosol chemistry is estimated by

simulations of Run\_Hete\_All, Run\_Hete\_N<sub>2</sub>O<sub>5</sub>, Run\_Hete\_NO<sub>x</sub>, and Run\_Hete\_HO<sub>2</sub>. The effect of aerosols on photolysis rates is estimated by Run\_AOD. **Fig. S7** shows the measured and simulated 2013–2017 anthropogenic trends (ppbv a<sup>-1</sup>) for the representative cities in the four focus megacity clusters, including the effects from individual model processes. The observed trends are for the residuals after removing the effect of meteorological variability (**Fig. 3**), and are for a single 0.5° × 0.625° grid cell representative of the urban core (to avoid averaging effects between grid cells).

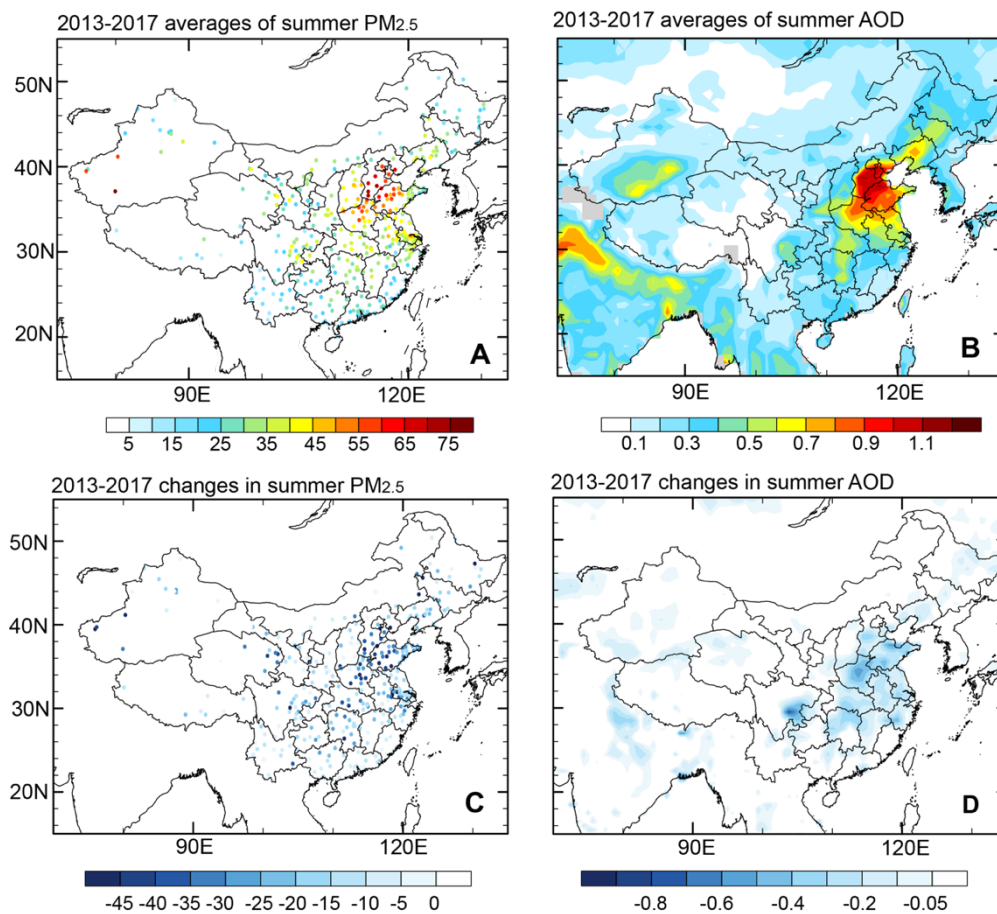

**Fig. S1.** *Top:* summer mean PM<sub>2.5</sub> concentrations ( $\mu\text{g m}^{-3}$ ) (A) and MODIS aerosol optical depth (AOD) (B) during 2013–2017. *Bottom:* changes in summer mean PM<sub>2.5</sub> concentrations ( $\mu\text{g m}^{-3}$ ) (C) and MODIS aerosol optical depth (AOD) (D) from 2013 to 2017. Changes in PM<sub>2.5</sub> concentrations are applied to aerosol surface area in the lower atmosphere (1st–10th model level, i.e., below 1.3 km) in the calculation of heterogeneous reactions by aerosols. Changes in AOD are applied to the calculation of photolysis rate through tropospheric column. Hourly surface PM<sub>2.5</sub> concentrations for 2013–2017 were obtained from the MEE surface observation network. The MODIS AOD is based on the monthly level-3 product (MYD08\_M3) from the Aqua satellite at 550 nm with a resolution of  $1^\circ \times 1^\circ$ .

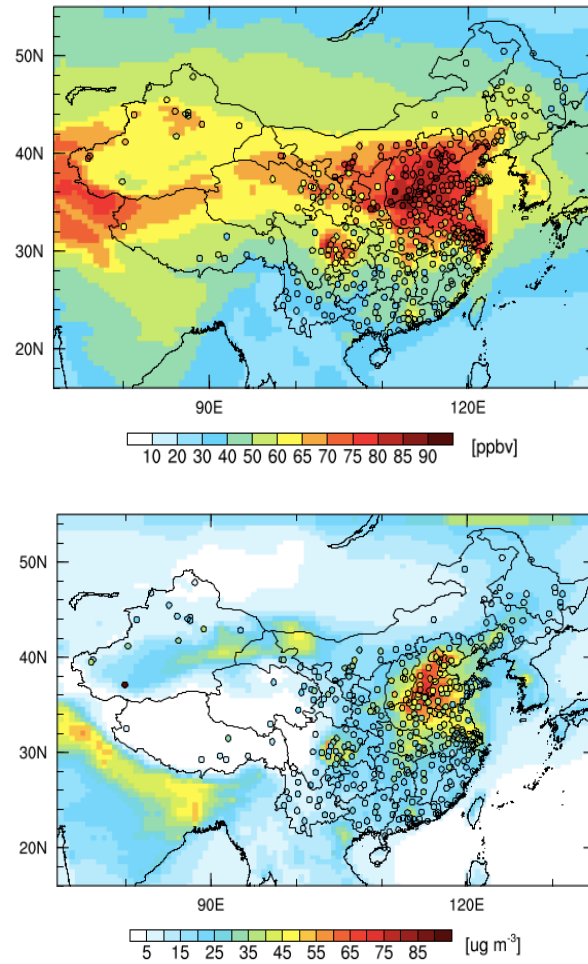

**Fig. S2.** Comparison of simulated (contour) and observed (dotted) MDA8 ozone (*top*) and PM<sub>2.5</sub> (*bottom*) in summer of 2017. The observed and simulated ozone concentration have an average of  $58.5 \pm 15.4$  and  $63.0 \pm 14.8$  ppbv, respectively, and a correlation coefficient of 0.89. For PM<sub>2.5</sub>, observed and simulated values have an average of  $27.2 \pm 10.8$ , and  $28.7 \pm 16.8$   $\mu\text{g m}^{-3}$ , respectively, and a correlation coefficient of 0.70.

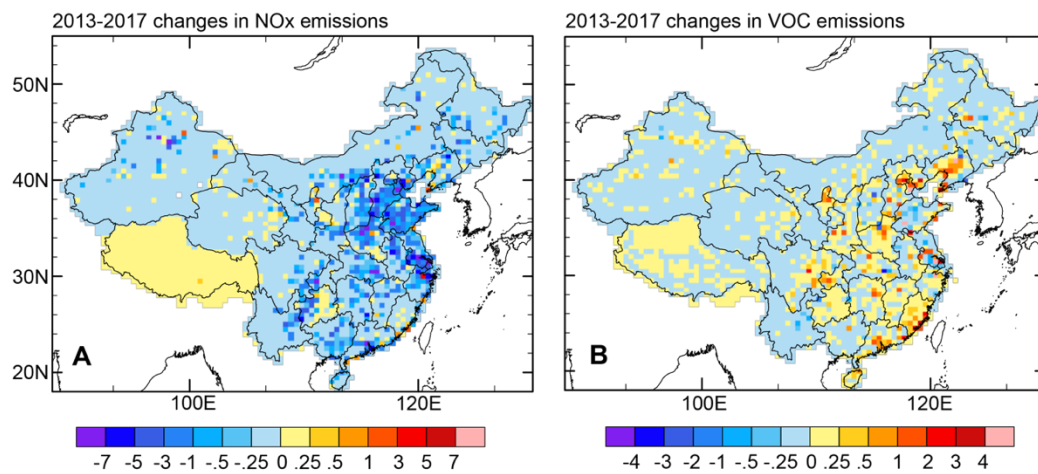

**Fig. S3.** 2013–2017 changes in anthropogenic emissions estimated from the MEIC inventory. Changes of NO<sub>x</sub> emissions (Gg NO<sub>x</sub>/grid cell) (**A**) and VOC emissions (Gg C/grid cell) (**B**) in summer between 2017 and 2013. The grid cells are 0.5° × 0.666°.

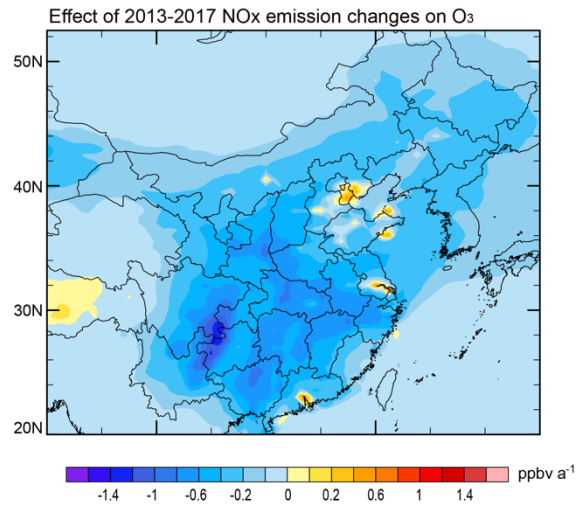

**Fig. S4.** Effects of 2013–2017 anthropogenic NO<sub>x</sub> emission changes on summer MDA8 ozone. The Figure shows GEOS-Chem model results for the changes in MDA8 ozone resulting from 2013–2017 changes in NO<sub>x</sub> emissions alone.



### HO<sub>x</sub> loss pathways

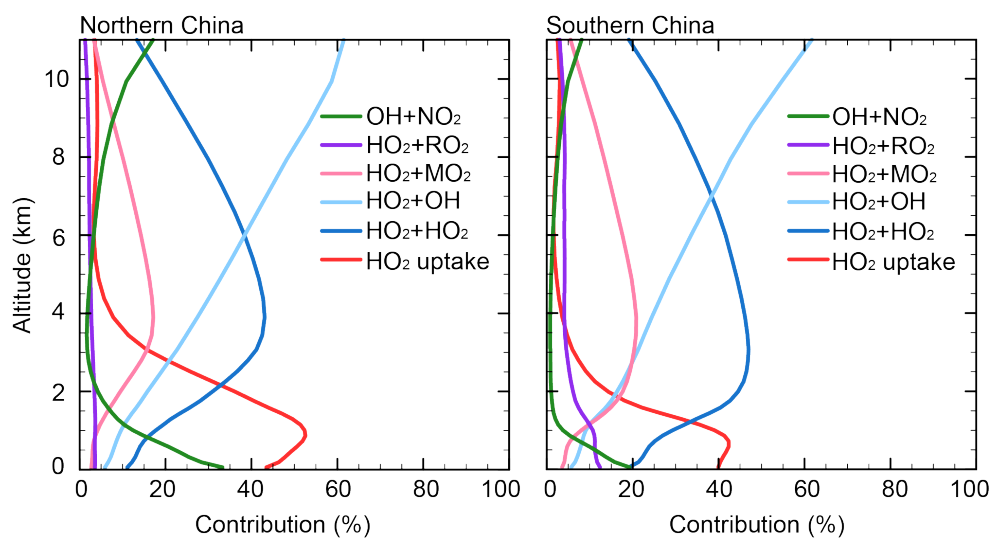

**Fig. S5.** GEOS-Chem simulated relative contributions of major loss pathways to the total HO<sub>x</sub> sink over northern China (100°–120°E, 34°–42°N, *left*) and southern China (100°–120°E, 22°–30°N, *right*) in summer 2016. MO<sub>2</sub> refers to the methylperoxy radical (CH<sub>3</sub>O<sub>2</sub>) and RO<sub>2</sub> refers to all other organic peroxy radicals.

Sensitivity of ozone to product of HO<sub>2</sub> uptake by aerosols

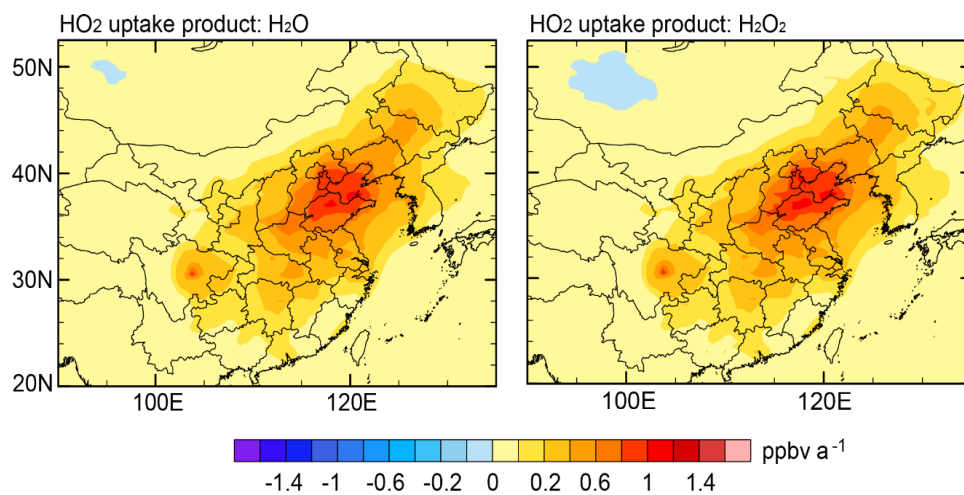

**Fig. S6.** Simulated effects on mean summer MDA8 ozone when the product of HO<sub>2</sub> uptake by aerosols is taken to be H<sub>2</sub>O (*left*) or H<sub>2</sub>O<sub>2</sub> (*right*), as determined by difference between corresponding GEOS-Chem simulations for 2013 (see **Table S4**).

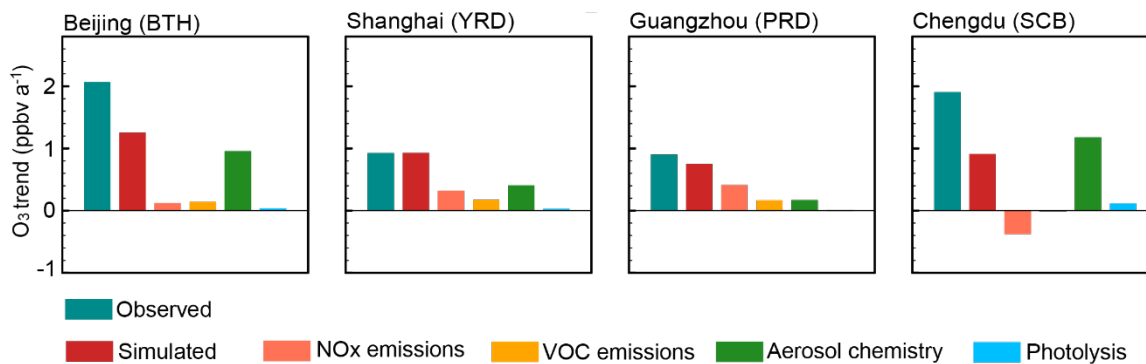

**Fig. S7.** Measured and simulated 2013–2017 anthropogenic ozone trends (ppbv a<sup>-1</sup>) for representative cities in the four focus megacity clusters, including the effects from individual model processes. The observed trends are for the residuals after removing the effect of meteorological variability (**Fig. 3**), and for single  $0.5^\circ \times 0.625^\circ$  grid cells in the urban core.

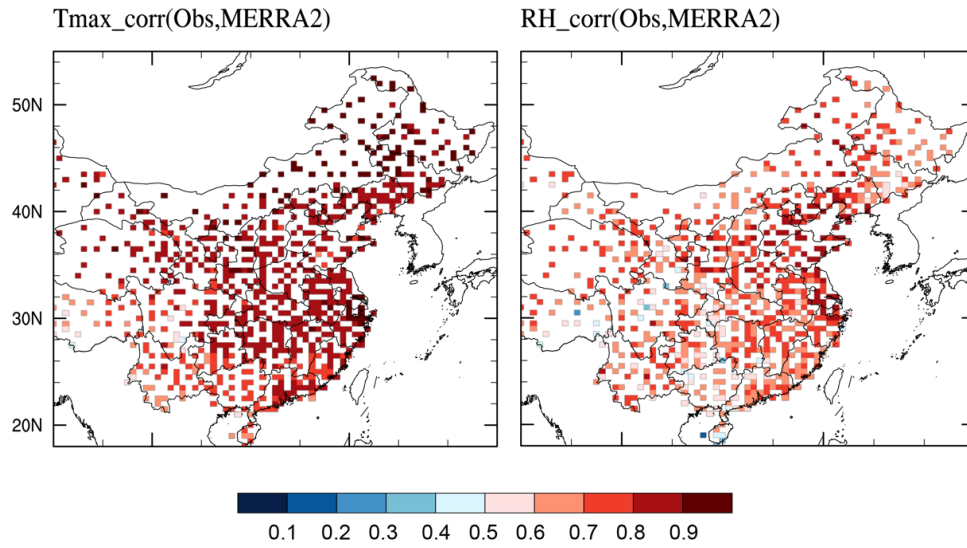

**Fig. S8.** Correlation coefficients between MERRA-2 and weather station measurements of daily maximum temperature (Tmax, *left*) and daily mean relative humidity (RH, *right*) during the 2013–2017 summers. A total of 839 Chinese weather stations with continuous records from the China National Meteorological Information Center (NMIC; <http://data.cma.cn/en>) are used, with data averaged onto the  $0.5^\circ$  latitude  $\times$   $0.625^\circ$  longitude MERRA-2 grid.

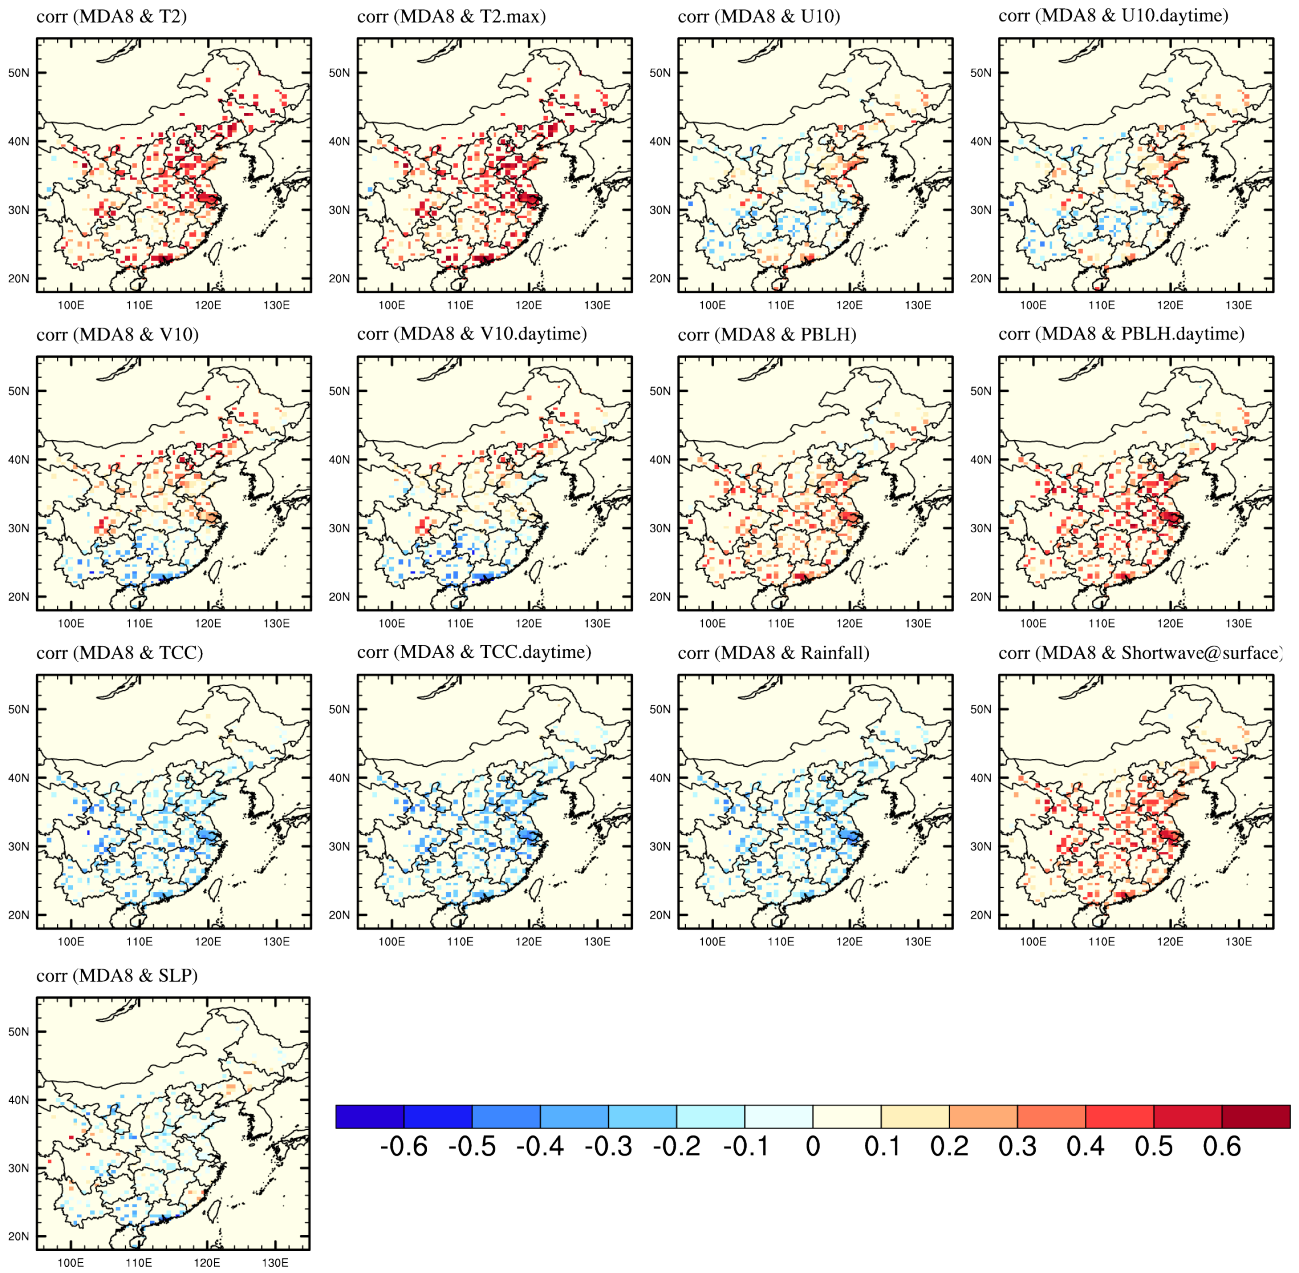

**Fig. S9.** Correlation coefficients of daily MDA8 ozone and meteorological variables for 2013–2017 summers. Only correlation coefficients that are statistically significant at 95% confidence level are shown. See details for variables in **Table S3**.

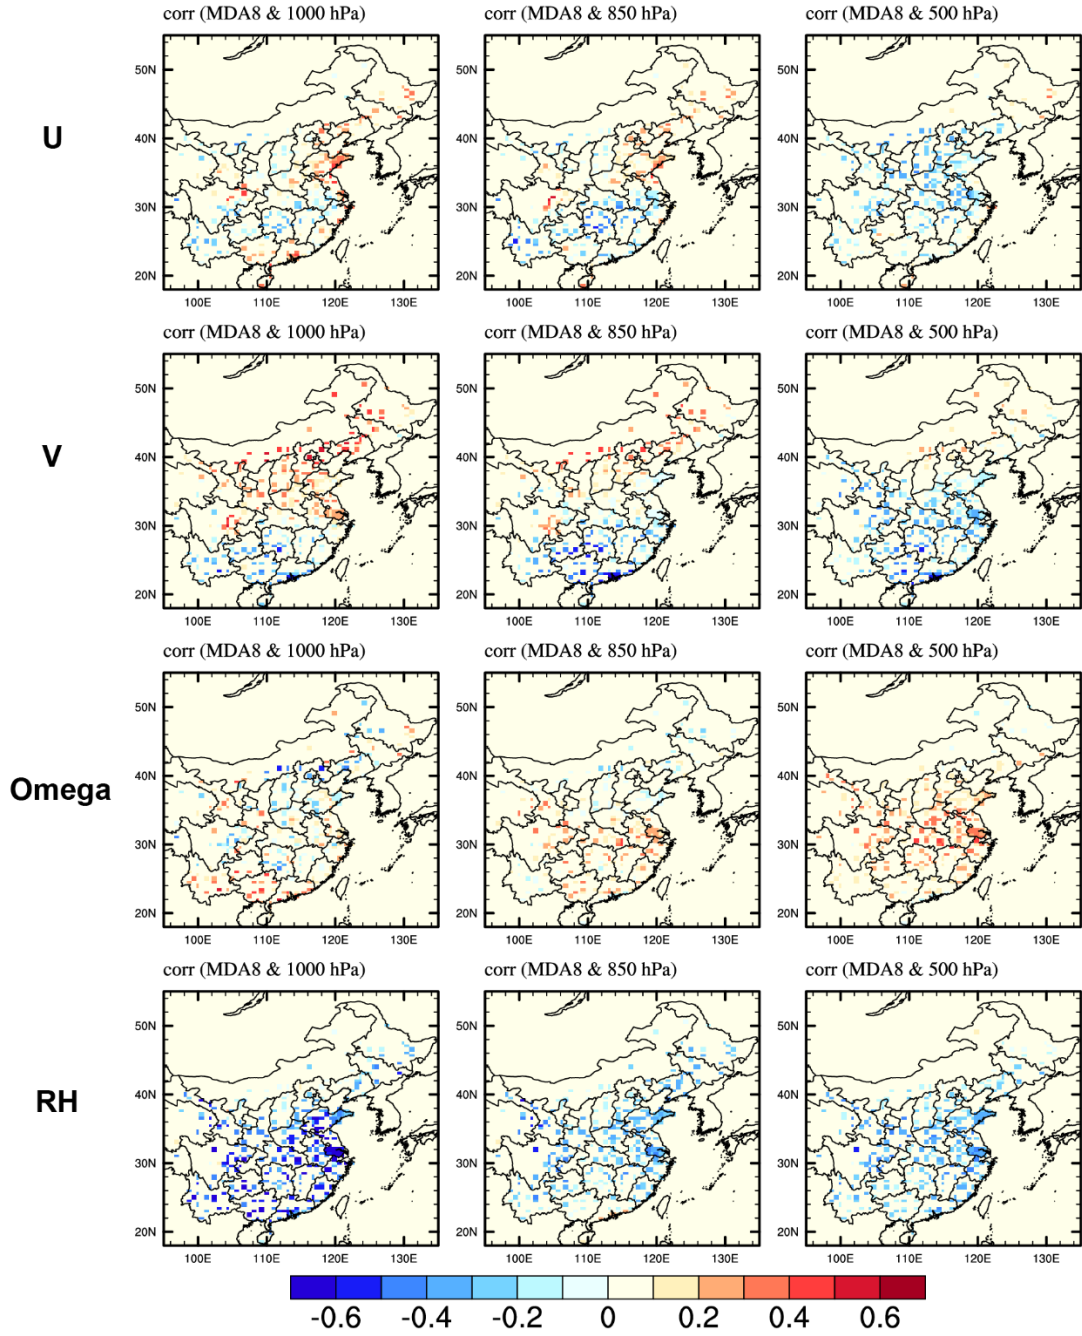

Fig. S9. Continued.

**Table S1. Statistics for observed ozone trends (ppbv a<sup>-1</sup>) during 2013–2017<sup>a</sup>.**

| Region | number of sites | Average | Median | Maximum | Minimum |
|--------|-----------------|---------|--------|---------|---------|
| BTH    | 13              | 3.11    | 2.97   | 5.25    | 0.20    |
| YRD    | 22              | 2.29    | 1.64   | 10.2    | -2.88   |
| PRD    | 12              | 0.56    | 0.74   | 3.99    | -1.82   |
| SCB    | 14              | 1.63    | 1.25   | 6.72    | -0.65   |

<sup>a</sup> Trends for the ensemble of sites in the four megacity clusters of **Fig. 1**.

**Table S2. Percentage changes (%) of emissions and PM<sub>2.5</sub> concentrations from 2013 to 2017.<sup>a</sup>**

| Region | NO <sub>x</sub> | VOC  | SO <sub>2</sub> | OC  | BC  | PM <sub>2.5</sub> |
|--------|-----------------|------|-----------------|-----|-----|-------------------|
| BTH    | -23             | +6.7 | -66             | -46 | -39 | -41               |
| YRD    | -21             | +8.2 | -67             | -35 | -26 | -36               |
| PRD    | -16             | +3.7 | -45             | -32 | -19 | -12               |
| SCB    | -17             | +5.8 | -67             | -32 | -31 | -39               |
| China  | -21             | +2.0 | -59             | -32 | -28 | -40               |

<sup>a</sup>Anthropogenic emission trends of NO<sub>x</sub>, VOC, SO<sub>2</sub>, organic carbon aerosol (OC), and black carbon aerosol (BC) are estimated from the MEIC inventory (18). PM<sub>2.5</sub> trends from the MEE surface observation network.



**Table S3. Meteorological fields considered as possible ozone covariates.**

| MERRA-2 surface variables <sup>a</sup>                                            |                                                                            | MERRA-2 surface variables <sup>a</sup> |                                                                     |
|-----------------------------------------------------------------------------------|----------------------------------------------------------------------------|----------------------------------------|---------------------------------------------------------------------|
| Acronym                                                                           | Description                                                                | Acronym                                | Description                                                         |
| T2                                                                                | 2-m air temperature (K)                                                    | PBLH.daytime                           | planetary boundary layer height averaged over 08:00 to 16:00 LT (m) |
| Tmax                                                                              | daily maximum 2-m air temperature (K)                                      | TCC                                    | total cloud area fraction (100%)                                    |
| U10                                                                               | 10-m zonal wind ( $\text{m s}^{-1}$ )                                      | TCC.daytime                            | total cloud area fraction averaged over 08:00 to 16:00 LT (%)       |
| U10.daytime                                                                       | 10-m zonal wind averaged over 08:00 to 16:00 LT ( $\text{m s}^{-1}$ )      | Rainfall                               | total precipitation ( $\text{mm d}^{-1}$ )                          |
| V10                                                                               | 10-m meridional wind ( $\text{m s}^{-1}$ )                                 | SLP                                    | sea level pressure (Pa)                                             |
| V10.daytime                                                                       | 10-m meridional wind averaged over 08:00 to 16:00 LT ( $\text{m s}^{-1}$ ) | Shortwave@surface                      | surface incoming shortwave flux ( $\text{W m}^{-2}$ )               |
| PBLH                                                                              | planetary boundary layer height (m)                                        |                                        |                                                                     |
| MERRA-2 variables at pressure level (1000 hPa, 850 hPa, and 500 hPa) <sup>b</sup> |                                                                            |                                        |                                                                     |
| U                                                                                 | zonal wind ( $\text{m s}^{-1}$ )                                           | Omega                                  | vertical pressure velocity ( $\text{Pa s}^{-1}$ )                   |
| V                                                                                 | meridional wind ( $\text{m s}^{-1}$ )                                      | RH                                     | relative humidity (100%)                                            |

<sup>a</sup>Temporal resolution is one-hour.

<sup>b</sup>Temporal resolution is three-hour.

**Table S4. GEOS-Chem sensitivity simulations**

| Simulation                                              | NO <sub>x</sub> | VOC  | Aerosol chemistry                                                                                            | Photolysis rates     |
|---------------------------------------------------------|-----------------|------|--------------------------------------------------------------------------------------------------------------|----------------------|
| CTRL                                                    | 2013            | 2013 | YES                                                                                                          | YES                  |
| Run_NO <sub>x</sub> _VOC                                | 2017            | 2017 | same as CTRL                                                                                                 | same as CTRL         |
| Run_NO <sub>x</sub>                                     | 2017            | 2013 | same as CTRL                                                                                                 | same as CTRL         |
| Run_Hete_All                                            | 2013            | 2013 | scaled by PM <sub>2.5</sub> changes for all aerosol chemistry                                                | scaled by AOD change |
| Run_Hete_N <sub>2</sub> O <sub>5</sub>                  | 2013            | 2013 | scaled by PM <sub>2.5</sub> changes only for NO <sub>2</sub> /NO <sub>3</sub> and HO <sub>2</sub>            | scaled by AOD change |
| Run_Hete_NO <sub>x</sub>                                | 2013            | 2013 | scaled by PM <sub>2.5</sub> changes only for N <sub>2</sub> O <sub>5</sub> /HO <sub>2</sub>                  | scaled by AOD change |
| Run_Hete_HO <sub>2</sub>                                | 2013            | 2013 | scaled by PM <sub>2.5</sub> changes only for N <sub>2</sub> O <sub>5</sub> /NO <sub>2</sub> /NO <sub>3</sub> | scaled by AOD change |
| Run_AOD                                                 | 2013            | 2013 | same as CTRL                                                                                                 | scaled by AOD change |
| Run_Hete_HO <sub>2</sub> _H <sub>2</sub> O <sub>2</sub> | 2013            | 2013 | same as Run_Hete_HO <sub>2</sub> but with H <sub>2</sub> O <sub>2</sub> being HO <sub>2</sub> uptake product | scaled by AOD change |

## References

1. Chen D, et al. (2009) Regional CO pollution and export in China simulated by the high-resolution nested-grid GEOS-Chem model. *Atmos Chem Phys* 9:3825-3839.
2. Sherwen T, et al. (2016) Global impacts of tropospheric halogens (Cl, Br, I) on oxidants and composition in GEOS-Chem. *Atmos Chem Phys* 16:12239-12271.
3. Martin RV, Jacob DJ, Yantosca RM, Chin M, Ginoux P (2003) Global and regional decreases in tropospheric oxidants from photochemical effects of aerosols. *J Geophys Res* 108:4097.
4. Jacob DJ (2000) Heterogeneous chemistry and tropospheric ozone. *Atmos Environ* 34:2131-2159.
5. Evans MJ, Jacob DJ (2005) Impact of new laboratory studies of N<sub>2</sub>O<sub>5</sub> hydrolysis on global model budgets of tropospheric nitrogen oxides, ozone, and OH. *Geophys Res Lett* 32:L09813.
6. Mao J, Fan S, Jacob DJ, Travis KR (2013) Radical loss in the atmosphere from Cu-Fe redox coupling in aerosols. *Atmos Chem Phys* 13:509-519.
7. Keller CA, et al. (2014) HEMCO v1.0: a versatile, ESMF-compliant component for calculating emissions in atmospheric models. *Geoscientific Model Development*, 7: 1409-1417.
8. Hoesly RM, et al. (2018) Historical (1750–2014) anthropogenic emissions of reactive gases and aerosols from the Community Emissions Data System (CEDS). *Geoscientific Model Development*, 11:369-408.
9. Li M, et al. (2017) MIX: a mosaic Asian anthropogenic emission inventory under the international collaboration framework of the MICS-Asia and HTAP. *Atmos Chem Phys* 17:935-963.
10. van der Werf GR, et al. (2010) Global fire emissions and the contribution of deforestation, savanna, forest, agricultural, and peat fires (1997–2009). *Atmos Chem Phys* 10:11707-11735.
11. Guenther A, et al. (2006) Estimates of global terrestrial isoprene emissions using MEGAN (Model of Emissions of Gases and Aerosols from Nature). *Atmos Chem Phys* 6:3181-3210.
12. Lou S, Liao H, Zhu B (2014) Impacts of aerosols on surface-layer ozone concentrations in China through heterogeneous reactions and changes in photolysis rates. *Atmos Environ* 85:123-138.
13. Zhu J, Liao H (2016) Future ozone air quality and radiative forcing over China owing to future changes in emissions under the Representative Concentration Pathways (RCPs). *J Geophys Res* 121:1978-2001.
14. Zhu J, Liao H, Mao Y, Yang Y, Jiang H (2017) Interannual variation, decadal trend, and future change in ozone outflow from East Asia. *Atmos Chem Phys* 17:3729-3747.
15. Wang Y, Zhang Y, Hao J, Luo M (2011) Seasonal and spatial variability of surface ozone over China: contributions from background and domestic pollution. *Atmos Chem Phys* 11:3511-3525.
16. Ni R, Lin J, Yan Y, Lin W (2018) Foreign and domestic contributions to springtime ozone over China. *Atmos Chem Phys* 18:11447-11469.
17. Wang Y, et al. (2013) Sensitivity of surface ozone over China to 2000–2050 global changes of climate and emissions. *Atmos Environ* 75:374-382.
18. Zheng B, et al. (2018) Trends in China's anthropogenic emissions since 2010 as the consequence of clean air actions. *Atmos Chem Phys* 18:14095-14111.
